# Gestational diabetes mellitus is associated with decreased adipose and placenta peroxisome proliferator-activator receptor $\gamma$ expression in a Chinese population

Yu Gao<sup>1</sup>, Ruilian She<sup>1</sup> and Wenqiong Sha<sup>1</sup>

<sup>1</sup>Department of Obstetrics and Gynecology, The Second Clinical Medical College of Jinan University, Shenzhen People's Hospital, Shenzhen, China

**Correspondence to:** Yu Gao, **email:** gaoyucool@outlook.com

**Keyword:** gestational diabetes mellitus; PPAR $\gamma$ ; adipose; placenta; glucose

**Received:** August 23, 2017

**Accepted:** November 13, 2017

**Published:** December 08, 2017

**Copyright:** Gao et al. This is an open-access article distributed under the terms of the Creative Commons Attribution License 3.0 (CC BY 3.0), which permits unrestricted use, distribution, and reproduction in any medium, provided the original author and source are credited.

## ABSTRACT

**Peroxisome proliferator-activated receptors  $\gamma$  (PPAR $\gamma$ ) is a member of nuclear receptor superfamily, and studies have demonstrated that dysregulation of PPAR $\gamma$  was associated with gestational diabetes mellitus (GDM), which is one of the most common metabolic abnormalities occurring during pregnancy. However, the results regarding the associations between PPAR $\gamma$  and GDM were conflicting among different studies. The present study aimed to determine the expression of PPAR $\gamma$  in adipose and placenta from GDM women in a Chinese population and to further explore the role of PPAR $\gamma$  in GDM women. The adipose and placenta tissues were isolated from GDM women and healthy pregnant women at term. The mRNA and protein expressions of PPAR $\gamma$  in adipose and placenta tissues were determined by qRT-PCR and western blot, respectively. Univariate correlation analysis was used to analyze the relationship between PPAR $\gamma$  expression and clinical characteristics of patients. The levels of tryglycerides and HbA1c were significantly higher, while the levels of low density lipoprotein (LDL) cholesterol, adiponectin and insulin were significantly lower in the GDM women than that in the healthy pregnant women. The mRNA and protein expression of PPAR $\gamma$  in both adipose and placenta from GDM women were significantly lower than that from healthy pregnant women. PPAR $\gamma$  mRNA expression in both adipose and placenta positively correlated with LDL cholesterol and adiponectin levels, and negatively correlated with tryglycerides and glucose levels at 0 h, 1 h and 2 h of 75 g oral glucose tolerance test. In summary, our results suggest that PPAR $\gamma$  may be a key modulator in the development of GDM, due to the roles of PPAR $\gamma$  in glucose homeostasis and adipose tissue development and function.**

## INTRODUCTION

Gestational diabetes mellitus (GDM) is one of the most common metabolic abnormalities occurring during pregnancy, and affects 1% to 14% of all pregnant women depending on ethnic group and the diagnostic test employed [1]. GDM is defined as glucose intolerance with onset or first recognition during pregnancy [2]. Studies have demonstrated that GDM was associated with various complications in both mother and newborn. Up to date,

several factors contributed to GDM have been identified, such as altered plasma adipokine levels, inflammation, deregulation of insulin signaling pathway, oxidative stress [3-6]. Unfortunately, the precise mechanisms underlying the pathophysiology of GDM are not fully understood.

Due to the regulatory roles of peroxisome proliferator-activated receptors  $\gamma$  (PPAR $\gamma$ ) in glucose and lipid metabolism, adipocyte differentiation, and inflammation, PPAR $\gamma$  has been shown to be associated with type 2 diabetes mellitus in a large number of

**Table 1: Clinical parameters between healthy pregnant and GDM subjects in the present study**

| Parameters                             | Healthy group (n = 38) | GDM group (n = 66) | P value          |
|----------------------------------------|------------------------|--------------------|------------------|
| Age (years)                            | 31.2 ± 5.4             | 31.5 ± 6.5         | 0.8104           |
| Pre-pregnancy BMI (kg/m <sup>2</sup> ) | 24.2 ± 4.5             | 25.6 ± 6.1         | 0.2202           |
| Pregnancy BMI (kg/m <sup>2</sup> )     | 28.7 ± 4.9             | 29.3 ± 7.2         | 0.6493           |
| Body weight gain (kg)                  | 11.5 ± 4.7             | 9.6 ± 6.5          | 0.1175           |
| GA at delivery (wks)                   | 37.6 ± 3.4             | 37.4 ± 2.9         | 0.7513           |
| Fetal weight (g)                       | 3471 ± 147             | 3511 ± 231         | 0.3392           |
| Total cholesterol (mg/dl)              | 255.8 ± 51.4           | 267.9 ± 48.9       | 0.2358           |
| HDL cholesterol (mg/dl)                | 79.2 ± 26.7            | 71.4 ± 25.1        | 0.1391           |
| LDL cholesterol (mg/dl)                | 153.4 ± 26.1           | 141.5 ± 27.9       | <b>0.0344</b>    |
| Tryglicerides (mg/dl)                  | 233.9 ± 75.6           | 268.8 ± 63.9       | <b>0.0138</b>    |
| Apoplipoprotein A1 (g/l)               | 1.89 ± 0.35            | 1.85 ± 0.47        | 0.649            |
| Apoplipoprotein B (g/l)                | 1.31 ± 0.33            | 1.23 ± 0.27        | 0.1832           |
| Adiponectin (ng/ml)                    | 4.06 ± 2.33            | 2.97 ± 1.45        | <b>0.004</b>     |
| HbA1c (%)                              | 5.16 ± 0.38            | 5.43 ± 0.49        | <b>0.0042</b>    |
| Insulin (μIU/ml)                       | 5.17 ± 2.9             | 3.71 ± 1.8         | <b>0.002</b>     |
| Glucose (mg/dl) 0 h                    | 73.5 ± 7.9             | 91.3 ± 19.8        | <b>&lt;0.001</b> |
| Glucose (mg/dl) 1 h                    | 163.9 ± 25.1           | 188.7 ± 41.3       | <b>0.0011</b>    |
| Glucose (mg/dl) 2 h                    | 129.8 ± 34.1           | 172.5 ± 29.8       | <b>&lt;0.001</b> |
| QUICK-IS                               | 0.43 ± 0.27            | 0.47 ± 0.19        | 0.3791           |

BMI, body mass index; GA, gestational age; HDL, high-density lipoprotein; LDL, low-density lipoprotein; QUICK-IS, quantitative insulin sensitivity check index.

studies [7-9]. Studies showed that PPAR $\gamma$  involved in the regulation of genes related to lipid synthesis and storage, adipokine production, and insulin signaling [10, 11]. Activation of PPAR  $\gamma$  by its agonist, thiazolidinediones, improved insulin sensitivity in insulin-resistant animal models and diabetic patients [12]. Mutation of human PPAR $\gamma$  gene has been found to be associated with increased insulin resistance, hypertension and diabetes [13]. In addition, PPAR $\gamma$  can also function in suppressing the production of monocyte and macrophages inflammatory cytokines such as TNF- $\alpha$ , IL-1 $\beta$  and IL-6 [14]. In the patients with GDM, the PPAR $\gamma$  was found to be down-regulated in both placenta tissues and adipose tissues [15, 16]. On the other hand, study investigating the mRNA expression of PPAR $\gamma$  in leukocyte showed that PPAR $\gamma$  was up-regulated in patients with GDM and positively correlated with glucose concentrations at 1 h and 2 h of 75 g oral glucose tolerance test (OGTT) and also negatively correlated with plasma high density lipoprotein (HDL) cholesterol concentration [17]. The conflicting results regarding the PPAR $\gamma$  expression in different tissues examined suggest the complex mechanisms of PPAR $\gamma$  in GDM.

Though the expression of PPAR $\gamma$  in adipose and placenta from patients with GDM has been demonstrated in separated studies, the association between PPAR $\gamma$  expression and the clinical characteristics has not been examined so far. In the present study, the expression of PPAR $\gamma$  was examined in both adipose tissues and placenta tissues from both healthy pregnant women and GDM women. The present study also measured the clinical characteristics in the recruited pregnant women, and we for the first time investigated the relationship between PPAR $\gamma$  expression in both adipose and placenta tissues and the relevant clinical parameters from a GDM women in a Chinese population. In addition, the underlying mechanisms in PPAR $\gamma$ -involved in GDM were discussed.

## RESULTS

### Clinical features of healthy pregnant and GDM subjects

The clinical parameters of 38 healthy pregnant women and 66 women with GDM were examined and the results were shown in Table 1. There were

no significant differences between healthy pregnant women and GDM women regarding age, pre-pregnancy body mass index (BMI), pregnancy BMI, body weight gain, gestational age at delivery, fetal weight, total cholesterol, high density lipoprotein (HDL) cholesterol, apolipoprotein A1, apolipoprotein B, quantitative insulin sensitivity check index (QUICK-IS). The levels of tryglycerides and HbA1c were significantly higher in the GDM women than that in the healthy pregnant women; while the levels of LDL cholesterol, adiponectin and insulin were significantly lower in the GDM women than that in the healthy pregnant women. As expected, the OGTT results showed that the levels of blood glucose at 0 h, 1 h and 2 h of 75 g OGTT were significantly higher in the GDM women than that in the healthy pregnant women.

### **PPAR $\gamma$ expression in the adipose and placenta from healthy pregnant and GDM women**

The qRT-PCR assay and western blotting assay were performed to examine the PPAR $\gamma$  mRNA and protein expression levels, respectively, in the adipose and placenta from the recruited subjects. The results showed that the PPAR $\gamma$  mRNA expression levels were significantly down-regulated in the GDM women when compared to that in the normal healthy pregnant women (Figure 1A), and western blot assay showed that the protein levels of PPAR $\gamma$  were lower in the adipose tissues from GDM women than from that from healthy pregnant subjects (Figure 1B). In addition, the mRNA and protein expression levels of PPAR $\gamma$  in the placenta tissues were also determined, and consistently, the mRNA and protein expression of PPAR $\gamma$  in the placenta from GDM women were significantly lower than that from healthy pregnant women (Figure 2A and 2B).

### **The correlation between adipose PPAR $\gamma$ mRNA expression and the clinical parameters in the GDM women**

Univariate correlation analysis using the Spearman correlation analysis was performed to examine the correlation between adipose PPAR $\gamma$  mRNA expression and the clinical parameters in the GDM women, and the results were shown in Table 2. The mRNA expression level of PPAR $\gamma$  was positively correlated with LDL cholesterol and adiponectin levels in the GDM women (Table 2, Figure 3A and 3C). In addition, the mRNA expression level of PPAR $\gamma$  was negatively correlated with tryglycerides levels and glucose levels at 0 h, 1 h, and 2 h of 75 g OGTT in GDM women (Table 2, Figure 3B, 3D, 3E and 3F). No significant correlation was observed between adipose PPAR $\gamma$  mRNA expression and the other clinical parameters in the GDM women (Table 2).

### **The correlation between placenta PPAR $\gamma$ mRNA expression and the clinical parameters in the GDM women**

Similarly, the correlation between placenta PPAR $\gamma$  mRNA expression and clinical parameters in the GDM women were also investigated and the results were shown in Table 3. The mRNA expression level of PPAR $\gamma$  was positively correlated with LDL cholesterol and adiponectin levels in the GDM women (Table 3, Figure 4A and 4C). In addition, the mRNA expression level of PPAR $\gamma$  was negatively correlated with tryglycerides levels and glucose levels at 0 h, 1 h, and 2 h of 75 g OGTT in GDM women (Table 2 and Figure 4B, 4D, 4E and 4F). No significant correlation was observed between placenta PPAR $\gamma$  mRNA expression and the other clinical parameters in the GDM women (Table 3).

## **DISCUSSION**

Pregnant women with GDM are at an increased risk of developing preeclampsia and delivering macrosomic infant [18]; and also are prone to developing type 2 diabetes mellitus and cardiovascular diseases after pregnancy [19]. For the newborns, they had an increased risk of developing neonatal hypoglycaemia, hypocalcaemia, polycythemia, respiratory distress syndrome [20], and they also are prone to develop obesity and abnormal glucose metabolism [21]. Because of poor availability of metabolic tissues from pregnant women, there is very limited knowledge about the significance of PPAR $\gamma$  in GDM. Studies have demonstrated the role of PPAR $\gamma$  in the normal placental development and trophoblast differentiation and invasion in gestational tissues [22, 23]. However, it would be helpful for us to have a better understanding of the PPAR $\gamma$  underlying the pathophysiology of GDM if more clinical samples can be collected from pregnant women for examination. As PPAR $\gamma$  is involved in glucose and lipid metabolism in type 2 diabetes mellitus [24, 25], it is probable that PPAR $\gamma$  may also play important roles in the GDM. In the present study, decreased expression of PPAR $\gamma$  was observed in both adipose tissues and placenta tissues from patients with GDM. Consistently, previous studies have shown that the expression of PPAR $\gamma$  was down-regulated in the adipose tissues from obese GDM women [16]. These results may suggest that the down-regulation of PPAR $\gamma$  may be an important modulator in the development of GDM.

The decreased expression of PPAR $\gamma$  was also observed in the patients with GDM, and this finding was consistent with previous reports showing down-regulation of placenta PPAR $\gamma$  expression under mild hyperglycaemia in GDM women and streptozotocin-induced diabetic rats [26, 27]. However, in mice study, PPAR $\gamma$  expression was found to be up-regulated in placentas of diabetic pregnant mice with severe hyperglycaemia [28]. In addition, the

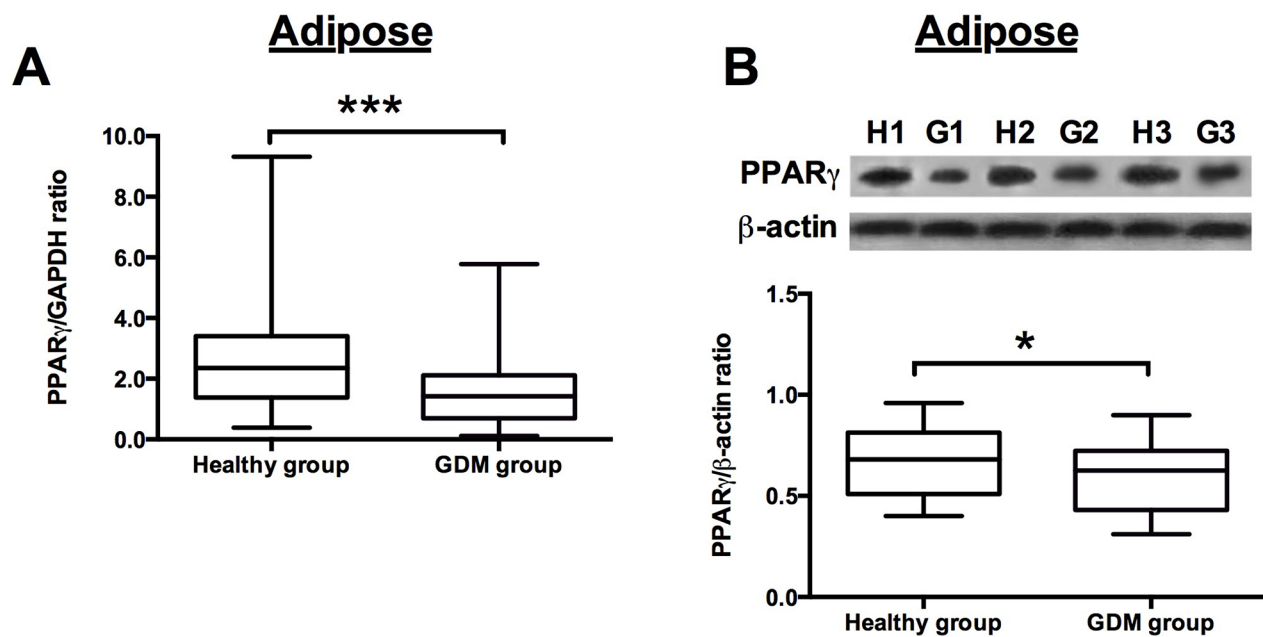

**Figure 1: PPAR<sub>γ</sub> expression in the adipose from healthy pregnant and GDM subjects.** (A) The relative expression of PPAR<sub>γ</sub> mRNA in the adipose from healthy pregnant (n = 38) and GDM subjects (n = 66) was determined by qRT-PCR. Differences between groups were analyzed by unpaired *t*-test. Significant differences between groups were indicated as \*\*\*P<0.001. (B) The representative western blotting images (upper panel) of PPAR<sub>γ</sub> in the adipose from 3 healthy pregnant and GDM subjects. H1, H2, H3 represent for healthy pregnant subject 1, 2 and 3, respectively; G1, G2 and G3 represent for GDM subject 1, 2 and 3, respectively; the densitometric analysis (lower panel) of PPAR<sub>γ</sub> protein as measured by western blot in the adipose from healthy pregnant (n = 38) and GDM subjects (n = 66). Differences between groups were analyzed by unpaired *t*-test. Significant differences between groups were indicated as \*\*\*P<0.001.

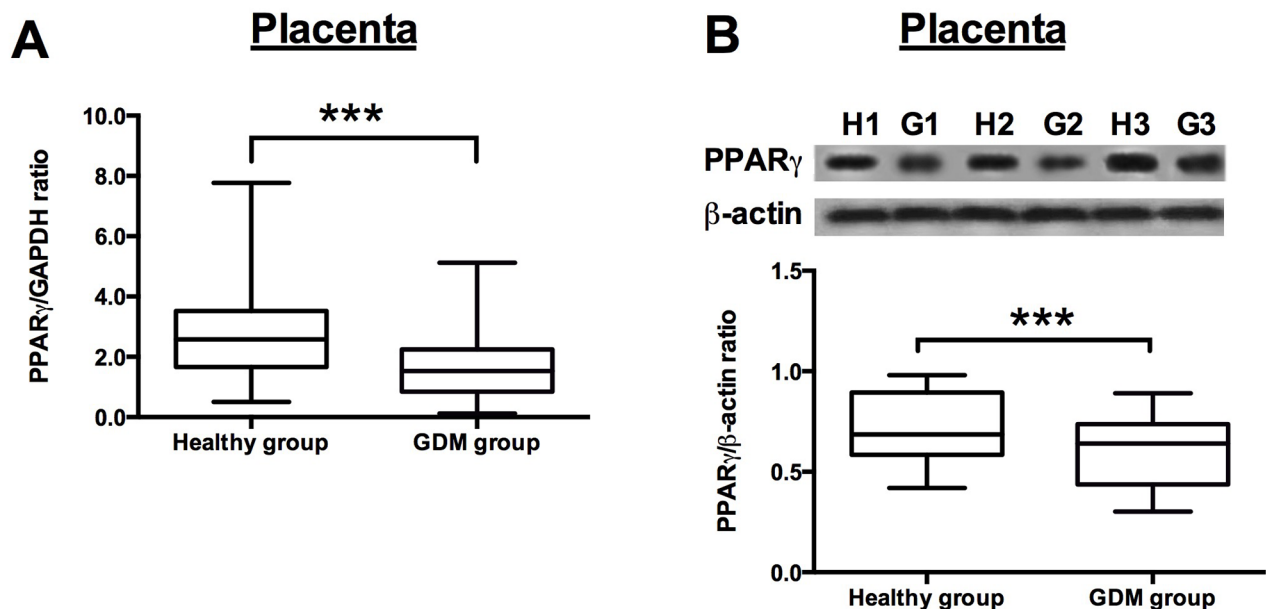

**Figure 2: PPAR<sub>γ</sub> expression in the placenta from healthy pregnant and GDM subjects.** (A) The relative expression of PPAR<sub>γ</sub> mRNA in the placenta from healthy pregnant (n = 38) and GDM subjects (n = 66) was determined by qRT-PCR. Differences between groups were analyzed by unpaired *t*-test. Significant differences between groups were indicated as \*\*\*P<0.001. (B) The representative western blotting images (upper panel) of PPAR<sub>γ</sub> in the placenta from 3 healthy pregnant and GDM subjects. H1, H2, H3 represent for healthy pregnant subject 1, 2 and 3, respectively; G1, G2 and G3 represent for GDM subject 1, 2 and 3, respectively; the densitometric analysis (lower panel) of PPAR<sub>γ</sub> protein as measured by western blot in the placenta from healthy pregnant (n = 38) and GDM subjects (n = 66). Differences between groups were analyzed by unpaired *t*-test. Significant differences between groups were indicated as \*\*\*P<0.001.

**Table 2: Univariate correlations between adipose PPAR $\gamma$  mRNA expression and clinical parameters of GDM subjects**

| Parameters                             | PPAR $\gamma$ levels in adipose tissues |               |
|----------------------------------------|-----------------------------------------|---------------|
|                                        | r value                                 | P value       |
| Age (years)                            | 0.132                                   | 0.6798        |
| Pre-pregnancy BMI (kg/m <sup>2</sup> ) | -0.112                                  | 0.1981        |
| Pregnancy BMI (kg/m <sup>2</sup> )     | -0.215                                  | 0.099         |
| Body weight gain (kg)                  | 0.334                                   | 0.3219        |
| GA at delivery (wks)                   | 0.026                                   | 0.4589        |
| Fetal weight (g)                       | -0.136                                  | 0.3324        |
| Total cholesterol (mg/dl)              | 0.412                                   | 0.5567        |
| HDL cholesterol (mg/dl)                | 0.199                                   | 0.1562        |
| LDL cholesterol (mg/dl)                | 0.2567                                  | <b>0.0375</b> |
| Tryglycerides                          | -0.3292                                 | <b>0.007</b>  |
| Apoplipoprotein A1 (g/l)               | 0.023                                   | 0.321         |
| Apoplipoprotein B (g/l)                | 0.117                                   | 0.432         |
| Adiponectin (ng/ml)                    | 0.2707                                  | <b>0.0279</b> |
| HbA1c (%)                              | -0.039                                  | 0.069         |
| Insulin ( $\mu$ IU/ml)                 | 0.119                                   | 0.075         |
| Glucose (mg/dl) 0 h                    | -0.2798                                 | <b>0.0229</b> |
| Glucose (mg/dl) 1 h                    | -0.27                                   | <b>0.0284</b> |
| Glucose (mg/dl) 2 h                    | -0.275                                  | <b>0.0255</b> |
| QUICK-IS                               | -0.023                                  | 0.453         |

BMI, body mass index; GA, gestational age; HDL, high-density lipoprotein; LDL, low-density lipoprotein; QUICK-IS, quantitative insulin sensitivity check index.

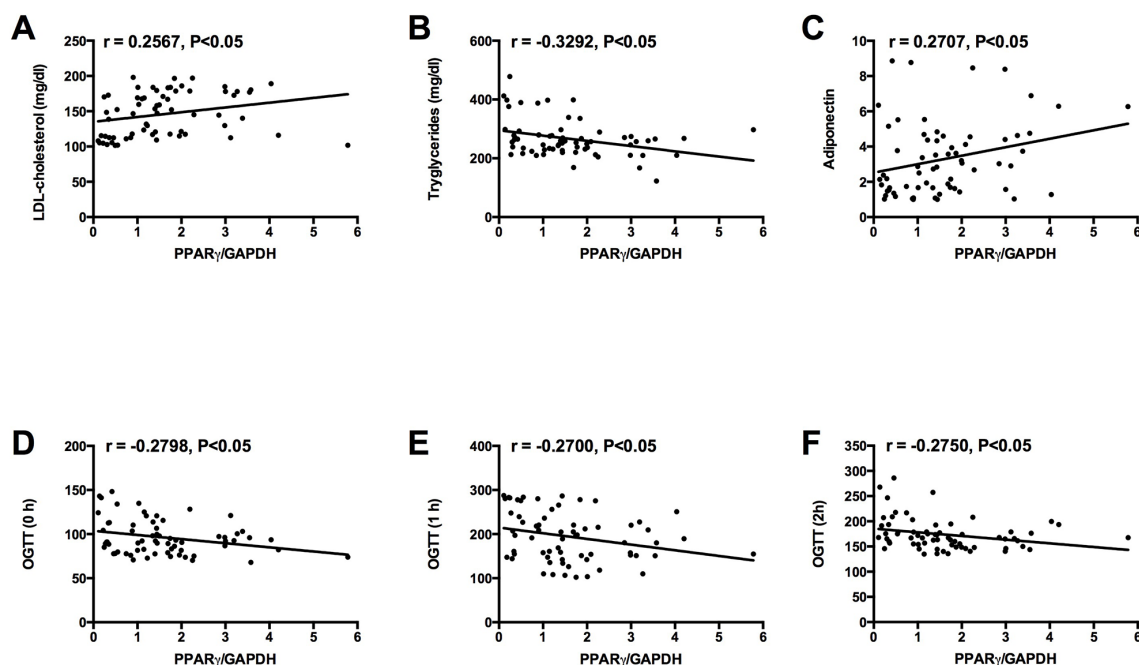

**Figure 3:** Correlations between adipose PPAR $\gamma$  mRNA expression and (A) LDL cholesterol level, (B) tryglycerides level, (C) adiponectin level, and glucose levels at (D) 0 h, (E) 1 h, and (F) 2 h of 75 g OGTT in GDM group.

**Table 3: Univariate correlations between placenta PPAR $\gamma$  mRNA expression and clinical parameters of GDM subjects**

| Parameters                             | PPAR $\gamma$ levels in placenta tissues |               |
|----------------------------------------|------------------------------------------|---------------|
|                                        | r value                                  | P value       |
| Age (years)                            | 0.167                                    | 0.3589        |
| Pre-pregnancy BMI (kg/m <sup>2</sup> ) | -0.229                                   | 0.2467        |
| Pregnancy BMI (kg/m <sup>2</sup> )     | -0.339                                   | 0.118         |
| Body weight gain (kg)                  | 0.227                                    | 0.4455        |
| GA at delivery (wks)                   | 0.039                                    | 0.3245        |
| Fetal weight (g)                       | -0.336                                   | 0.1986        |
| Total cholesterol (mg/dl)              | 0.447                                    | 0.5134        |
| HDL cholesterol (mg/dl)                | 0.286                                    | 0.2598        |
| LDL cholesterol (mg/dl)                | 0.2926                                   | <b>0.0171</b> |
| Tryglycerides                          | -0.3044                                  | <b>0.013</b>  |
| Apoplipoprotein A1 (g/l)               | 0.178                                    | 0.414         |
| Apoplipoprotein B (g/l)                | 0.217                                    | 0.053         |
| Adiponectin (ng/ml)                    | 0.3362                                   | <b>0.0058</b> |
| HbA1c (%)                              | -0.305                                   | 0.119         |
| Insulin ( $\mu$ IU/ml)                 | 0.227                                    | 0.097         |
| Glucose (mg/dl) 0 h                    | -0.2867                                  | <b>0.0196</b> |
| Glucose (mg/dl) 1 h                    | -0.3253                                  | <b>0.0077</b> |
| Glucose (mg/dl) 2 h                    | -0.2633                                  | <b>0.0327</b> |
| QUICK-IS                               | -0.083                                   | 0.453         |

BMI, body mass index; GA, gestational age; HDL, high-density lipoprotein; LDL, low-density lipoprotein; QUICK-IS, quantitative insulin sensitivity check index.

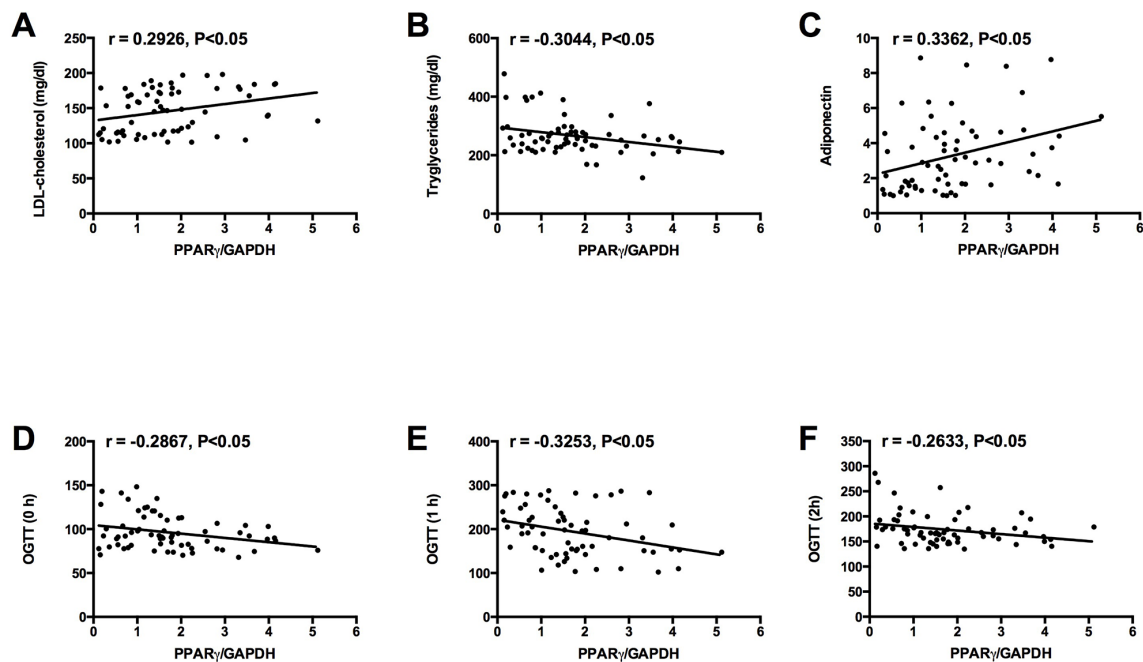

**Figure 4:** Correlations between placenta PPAR $\gamma$  mRNA expression and (A) LDL cholesterol level, (B) tryglycerides level, (C) adiponectin level, and glucose levels at (D) 0 h, (E) 1 h, and (F) 2 h of 75 g OGTT in GDM group.

expression of PPAR $\gamma$  in leukocyte was significantly higher in GDM women than that in healthy pregnant women, and the study suggested that leukocyte PPAR $\gamma$  overexpression may be a regulatory adaptation of the maternal organism to increased oxidative stress during diabetic pregnancy [17]. These discrepancies may partly result tissue-specific or species-specific differences in PPAR $\gamma$  expression. Therefore, in the future studies, it is necessary to examine the expression of PPAR $\gamma$  under different glycaemic conditions in different species or cells to resolve the contradictions. In our study, the glucose levels at 0 h, 1 h and 2 h of OGTT in GDM women were significantly higher than that in healthy pregnant women, while fast insulin levels were lower in GDM women. The expression of PPAR $\gamma$  in adipose and placenta from GDM women were negatively correlated with the glucose levels at 0 h, 1 h and 2 h of OGTT. On the contrary, previous studies showed that the expression of PPAR $\gamma$  in leukocyte was positively correlated with glucose levels at 0 h, 1 h and 2 h of OGTT in GDM women, and no correlation between leukocyte PPAR $\gamma$  expression and insulin levels in GDM women [17]. More studies should be performed to further elucidate these discrepancies. In terms of glucose metabolism, the synthetic agonists of PPAR $\gamma$ , thiazolidinediones, have been shown to improve glucose tolerance by enhancing insulin sensitivity and restoring the function of  $\beta$ -cells in diabetic subjects [29], and patients with a dominant-negative mutation in the PPAR $\gamma$  genes showed severe hyperglycemia, suggesting the important role of PPAR $\gamma$  in regulating glucose homeostasis [13]. In this regard, the reduced glucose tolerance of GDM women in the present study may be associated with regulatory role of PPAR $\gamma$  in glucose metabolism, which requires further mechanistic investigations.

The lipid and lipoprotein metabolism has been shown to be affected in the GDM women [30]. In the present study, we found that the levels of LDL cholesterol and adiponectin were significantly lower, and the levels of triglycerides were significantly higher in GDM women than that in healthy pregnant women. Consistently, studies from Koukkou et al., showed that LDL cholesterol was decreased and triglycerides was increased in GDM women [31]. Capobianco et al., showed that maternal serum adiponectin concentrations were significantly lower in GDM patients compared with patients with normal glucose tolerance [32]. In addition, we also found that the expression of PPAR $\gamma$  in both adipose and placenta tissues from GDM women was negatively correlated with triglycerides levels, and positively correlated with LDL cholesterol and adiponectin levels, suggesting PPAR $\gamma$  may be involved the altered metabolism of lipid and lipoprotein in GDM women. However, the relationship between PPAR $\gamma$  expression and altered metabolism of lipid and lipoprotein in GDM women may require further examination. Both *in vitro* and *in vivo* studies have demonstrated that PPAR $\gamma$  played important roles

in the transcriptional cascade underlying adipocyte differentiation [33, 34], and PPAR $\gamma$  also was essential for the entraining of adipose tissue lipid metabolism to nutritional state [35]. More importantly, PPAR $\gamma$  was found to promote futile cycling in adipocytes between triglyceride esterification and de-esterification [36]. Taken together, the significant correlations between PPAR $\gamma$  and LDL cholesterol, adiponectin and triglycerides may be due to role of PPAR $\gamma$  in the cellular assimilation of lipids via anabolic pathways.

In conclusion, we demonstrated the down-regulation of PPAR $\gamma$  in both adipose and placenta tissues from GDM women, and we showed for the first time that expression of PPAR $\gamma$  in both adipose and placenta tissues was negatively correlated with hyperglycaemia. Our studies also suggested that PPAR $\gamma$  may be involved in the altered glucose metabolism, lipid and lipoprotein metabolism in the GDM women. Further studies are required to fully understand the role of PPAR $\gamma$  underlying the pathophysiology of GDM.

## MATERIALS AND METHODS

### Subject recruitment

In the present study, a total of 104 pregnant women between 26-37 weeks of gestation were recruited at the Shenzhen People's Hospital, Shenzhen, China. The age range between 22-39 years old. All the clinical investigations were approved by the Bioethics Committee of the Shenzhen People's Hospital and were conducted in accordance with the guidelines in the Declaration of Helsinki. Informed consent was obtained from all the recruited subjects. The GDM was diagnosed if one or more plasma glucose levels were elevated during a 75 g, 2 h oral glucose tolerance test (OGTT) according to the criteria set by WHO [37]. Among all the recruited subjects, 66 subjects were diagnosed with GDM, and 38 subjects were healthy pregnant women. The inclusion criteria for this study were the following: no GDM in the previous pregnancy; no family history of diabetes in the first-degree relatives; not taking insulin or oral hypoglycaemic medications; absence of any form of the pre-pregnancy diabetes; no control by diet and exercise before the overnight fast.

### Adipose and placenta tissues collection

The subcutaneous adipose tissue and term placental tissues were obtained from all recruited subjects after Cesarean section at term under a continuous lumbar epidural infusion of local anesthetic in the Department of Obstetrics at the Shenzhen People's Hospital. The placental villous explants were obtained after the basal and the chorionic plates were dissected out from central

cotyledons. The adipose tissues and placental villous explants were immediately snap-frozen in liquid nitrogen and stored in -80 °C for further analysis.

### Quantitative real-time PCR (qRT-CPR)

Total RNA from adipose tissues or placenta tissues was extracted by using the TRIzol reagent (Invitrogen, Carlsbad, USA) according to the manufacturer's instructions. Total RNA was reverse transcribed into cDNA by using the Reverse Transcription System Kit (Applied Biosystems, Illinois, USA). The real time PCR was performed with an Applied Biosystems Prim7500 Fast Sequence Detection System using TaqMan universal PCR master mix according to the manufacturer's instructions (Applied Biosystems). The mRNA expression levels of PPAR $\gamma$  were normalized to GAPDH. The primers of PPAR $\gamma$  were as follow: forward: 5'-GGGATCAGCTCCGTGGATCT-3'; reverse: 5'-TGCACTTTGGTACTCTTGAAGTT-3'. The primers of GAPDH were as follow: forward: 5'-GCACCGTCAAGGCTGAGAAC-3'; reverse: 5'-TGG TGAAGACGCCAGTGGGA-3'. The relative expression levels of PPAR $\gamma$  was calculated based on the  $2^{-\Delta\Delta C_t}$  method.

### Western blot

The proteins from the tissue samples were extracted by using the ice-cold lysis buffer with protease inhibitor cocktails. The extracted proteins were separated with the use of SDS-polyacrylamide gel electrophoresis. Proteins were then transferred to a nitrocellulose membrane and the membrane was incubated with 1% BSA in PBST at room temperature for 1 h. Then the membrane was further incubated with polyclonal rabbit anti-PPAR $\gamma$  antibodies (1:1500; Abcam, Cambridge, USA) and monoclonal rabbit anti- $\beta$ -actin (1:3000; used as internal control, Abcam) at 4 °C overnight. The membrane was washed and further incubated with HRP-conjugated secondary antibodies. The bands of proteins were detected by using the Western Blotting Luminal Reagent (Thermo Fisher Scientific) according to manufacturer's instructions.

### Anthropometric and biochemical measurements

The recruited subjects gave information on their maternal age and pre-pregnancy weight. The weight and height of patients during the third trimester of pregnancy and the fetal weight were measured by standard methods, and both body again and pre-pregnancy body mass index (BMI) expressed as weight before pregnancy divided by height square were calculated.

Blood samples were drawn after a 12 h overnight fast. Serum total cholesterol, HDL-cholesterol, LDL cholesterol and triglycerides were determined by the total cholesterol CHOD-PAP and triglyceride GPO-PAP kits (Roche, Mannheim, Germany). Apolipoprotein A1, apolipoprotein B, and adiponectin concentrations were measured by enzyme-

linked immunosorbent assay method (AssayPro, St. Charles, USA). The glycated haemoglobin (HbA $_{1c}$ ) was measured by a latex enhanced turbidimetric immunoassay using specific monoclonal antibodies. Plasma insulin was quantified using Elecsys insulin assay (Roche). To assess insulin sensitivity, the quantitative insulin check index (QUICKI-IS) was calculated as follow: QUICKI =  $1/[\log(I0) + \log(G0)]$ , where I0 is the fasting plasma insulin ( $\mu$ U/ml) and G0 is the fasting blood glucose concentration (mg/dl) [38].

### Statistical analysis

All the statistical analysis and graphs plotting were performed by using GraphPad Prism Version 6.0 software. All the data were presented as mean  $\pm$  standard deviation. Differences between the two groups, including clinical parameters and expression data were analyzed by unpaired Student's *t*-test. Relationship between PPAR $\gamma$  mRNA expression and clinical parameters were determined by the nonparametric test of Spearman's rank correlation coefficient. P values less than 0.05 were considered to be statistically significant.

### CONFLICTS OF INTEREST

None.

### FUNDING

This project was supported by the Shenzhen Basic Research Program (No. JCYJ20140416122812000).

### REFERENCES

1. Chiefari E, Arcidiacono B, Foti D, Brunetti A. Gestational diabetes mellitus: an updated overview. *J Endocrinol Invest.* 2017; 40:899–909.
2. Mericq V, Martinez-Aguayo A, Uauy R, Iniguez G, Van der Steen M, Hokken-Koelega A. Long-term metabolic risk among children born premature or small for gestational age. *Nat Rev Endocrinol.* 2017; 13:50–62.
3. Barbour LA, McCurdy CE, Hernandez TL, Kirwan JP, Catalano PM, Friedman JE. Cellular mechanisms for insulin resistance in normal pregnancy and gestational diabetes. *Diabetes care.* 2007; 30:S112–119.
4. Colomiere M, Permezel M, Lappas M. Diabetes and obesity during pregnancy alter insulin signalling and glucose transporter expression in maternal skeletal muscle and subcutaneous adipose tissue. *J Mol Endocrinol.* 2010; 44:213–223.
5. Retnakaran R, Hanley AJ, Raif N, Connelly PW, Sermer M, Zinman B. Reduced adiponectin concentration in women with gestational diabetes: a potential factor in progression to type 2 diabetes. *Diabetes Care.* 2004; 27:799–800.



6. Ranheim T, Haugen F, Staff AC, Braekke K, Harsem NK, Drevon CA. Adiponectin is reduced in gestational diabetes mellitus in normal weight women. *Acta Obstet Gynecol Scand.* 2004; 83:341–347.
7. Lv X, Zhang L, Sun J, Cai Z, Gu Q, Zhang R, Shan A. Interaction between peroxisome proliferator-activated receptor gamma polymorphism and obesity on type 2 diabetes in a Chinese Han population. *Diabetol Metab Syndr.* 2017; 9:7.
8. Majid M, Masood A, Kadla SA, Hameed I, Ganai BA. Association of Pro12Ala polymorphism of peroxisome proliferator-activated receptor gamma 2 (PPARgamma2) gene with type 2 diabetes mellitus in ethnic kashmiri population. *Biochem Genet.* 2017; 55:10–21.
9. Raj R, Bhatti JS, Bhadada SK, Ramteke PW. Association of polymorphisms of peroxisome proliferator activated receptors in early and late onset of type 2 diabetes mellitus. *Diabetes Metab Syndr.* 2017; 11:S287–S293.
10. He W, Barak Y, Hevener A, Olson P, Liao D, Le J, Nelson M, Ong E, Olefsky JM, Evans RM. Adipose-specific peroxisome proliferator-activated receptor gamma knockout causes insulin resistance in fat and liver but not in muscle. *Proc Natl Acad Sci U S A.* 2003; 100:15712–15717.
11. Camacho A, Huang JK, Delint-Ramirez I, Yew Tan C, Fuller M, Lelliott CJ, Vidal-Puig A, Franklin RJ. Peroxisome proliferator-activated receptor gamma-coactivator-1 alpha coordinates sphingolipid metabolism, lipid raft composition and myelin protein synthesis. *Eur J Neurosci.* 2013; 38:2672–2683.
12. Olefsky JM. Treatment of insulin resistance with peroxisome proliferator-activated receptor gamma agonists. *J Clin Invest.* 2000; 106:467–472.
13. Barroso I, Gurnell M, Crowley VE, Agostini M, Schwabe JW, Soos MA, Maslen GL, Williams TD, Lewis H, Schafer AJ, Chatterjee VK, O’Rahilly S. Dominant negative mutations in human PPARgamma associated with severe insulin resistance, diabetes mellitus and hypertension. *Nature.* 1999; 402:880–883.
14. Jiang C, Ting AT, Seed B. PPAR-gamma agonists inhibit production of monocyte inflammatory cytokines. *Nature.* 1998; 391:82–86.
15. Capobianco E, Martinez N, Fornes D, Higa R, Di Marco I, Basualdo MN, Faingold MC, Jawerbaum A. PPAR activation as a regulator of lipid metabolism, nitric oxide production and lipid peroxidation in the placenta from type 2 diabetic patients. *Mol Cell Endocrinol.* 2013; 377:7–15.
16. Catalano PM, Nizielski SE, Shao J, Preston L, Qiao L, Friedman JE. Downregulated IRS-1 and PPARgamma in obese women with gestational diabetes: relationship to FFA during pregnancy. *Am J Physiol Endocrinol Metab.* 2002; 282:E522–533.
17. Wojcik M, Mac-Marcjanek K, Nadel I, Wozniak L, Cypryk K. Gestational diabetes mellitus is associated with increased leukocyte peroxisome proliferator-activated receptor gamma expression. *Arch Med Sci.* 2015; 11:779–787.
18. Hay WW Jr. Care of the infant of the diabetic mother. *Curr Diab Rep.* 2012; 12:4–15.
19. Burlina S, Dalfrà MG, Chilelli NC, Lapolla A. Gestational diabetes mellitus and future cardiovascular risk: an Update. *Int J Endocrinol.* 2016; 2016:2070926.
20. Flores-le Roux JA, Sagarra E, Benaiges D, Hernandez-Rivas E, Chillaron JJ, Puig de Dou J, Mur A, Lopez-Vilchez MA, Pedro-Botet J. A prospective evaluation of neonatal hypoglycaemia in infants of women with gestational diabetes mellitus. *Diab Res Clin Pract.* 2012; 97:217–222.
21. Logan KM, Gale C, Hyde MJ, Santhakumaran S, Modi N. Diabetes in pregnancy and infant adiposity: systematic review and meta-analysis. *Arch Dis Child Fetal Neonatal Ed.* 2017; 102:F65–F72.
22. Barak Y, Nelson MC, Ong ES, Jones YZ, Ruiz-Lozano P, Chien KR, Koder A, Evans RM. PPAR gamma is required for placental, cardiac, and adipose tissue development. *Mol Cell.* 1999; 4:585–595.
23. Tarrade A, Schoonjans K, Pavan L, Auwerx J, Rochette-Egly C, Evain-Brion D, Fournier T. PPARgamma/RXRalpha heterodimers control human trophoblast invasion. *J Clin Endocrinol Metab.* 2001; 86:5017–5024.
24. Lu P, Zhao Z. Advances on PPARgamma research in the emerging era of precision medicine. *Curr Drug Targets.* 2017.
25. Ishibashi K, Takeda Y, Nakatani E, Sugawara K, Imai R, Sekiguchi M, Takahama R, Ohkura N, Atsumi GI. Activation of PPARgamma at an early stage of differentiation enhances adipocyte differentiation of MEFs derived from type II diabetic TSOD mice and alters lipid droplet morphology. *Biol Pharm Bull.* 2017; 40:852–859.
26. Capobianco E, Jawerbaum A, Romanini MC, White V, Pustovrh C, Higa R, Martinez N, Mugnaini MT, Sonez C, Gonzalez E. 15-Deoxy-Delta12,14-prostaglandin J2 and peroxisome proliferator-activated receptor gamma (PPARgamma) levels in term placental tissues from control and diabetic rats: modulatory effects of a PPARgamma agonist on nitridergic and lipid placental metabolism. *Reprod Fertil Dev.* 2005; 17:423-433.
27. Jawerbaum A, Capobianco E, Pustovrh C, White V, Baier M, Salzberg S, Pesaresi M, Gonzalez E. Influence of peroxisome proliferator-activated receptor gamma activation by its endogenous ligand 15-deoxy Delta12,14 prostaglandin J2 on nitric oxide production in term placental tissues from diabetic women. *Mol Hum Reprod.* 2004; 10:671-676.
28. Suwaki N, Masuyama H, Masumoto A, Takamoto N, Hiramatsu Y. Expression and potential role of peroxisome proliferator-activated receptor gamma in the placenta of diabetic pregnancy. *Placenta.* 2007; 28:315-323.
29. Cavaghan MK, Ehrmann DA, Byrne MM, Polonsky KS. Treatment with the oral antidiabetic agent troglitazone improves beta cell responses to glucose in subjects with impaired glucose tolerance. *J Clin Invest.* 1997; 100:530-537.

30. Herrera E, Desoye G. Maternal and fetal lipid metabolism under normal and gestational diabetic conditions. *Horm Mol Biol Clin Investigation*. 2016; 26:109-127.
31. Koukoku E, Watts GF, Lowy C. Serum lipid, lipoprotein and apolipoprotein changes in gestational diabetes mellitus: a cross-sectional and prospective study. *J Clin Pathol*. 1996; 49:634-637.
32. Pala HG, Ozalp Y, Yener AS, Gerceklioglu G, Uysal S, Onvural A. Adiponectin levels in gestational diabetes mellitus and in pregnant women without glucose intolerance. *Adv Clin Exp Med*. 2015; 24:85-92.
33. Sandouk T, Reda D, Hofmann C. Antidiabetic agent pioglitazone enhances adipocyte differentiation of 3T3-F442A cells. *Am J Physiol*. 1993; 264:C1600-1608.
34. Rosen ED, Sarraf P, Troy AE, Bradwin G, Moore K, Milstone DS, Spiegelman BM, Mortensen RM. PPAR gamma is required for the differentiation of adipose tissue *in vivo* and *in vitro*. *Mol Cell*. 1999; 4:611-617.
35. Semple RK, Chatterjee VK, O'Rahilly S. PPAR gamma and human metabolic disease. *J Clin Invest*. 2006; 116:581-589.
36. Guan HP, Li Y, Jensen MV, Newgard CB, Steppan CM, Lazar MA. A futile metabolic cycle activated in adipocytes by antidiabetic agents. *Nature Med*. 2002; 8:1122-1128.
37. Bertero T, Grosso S, Robbe-Sermesant K, Lebrigand K, Henaoui IS, Puissegur MP, Fourre S, Zaragosi LE, Mazure NM, Ponzio G, Cardinaud B, Barbry P, Rezzonico R, et al. "Seed-Milarity" confers to hsa-miR-210 and hsa-miR-147b similar functional activity. *PLoS One*. 2012; 7:e44919.
38. Katz A, Nambi SS, Mather K, Baron AD, Follmann DA, Sullivan G, Quon MJ. Quantitative insulin sensitivity check index: a simple, accurate method for assessing insulin sensitivity in humans. *J Clin Endocrinol Metabol*. 2000; 85:2402-2410.
